# Supplementary material for: Unveiling TRPV1 Spatio-Temporal Organization in Live Cell Membranes
Source: PLoS One. 2015 Mar 12;10(3):e0116900. doi: 10.1371/journal.pone.0116900 (PMC4357434; doi:10.1371/journal.pone.0116900)
Supplement: S1 Text — (PDF) [file pone.0116900.s007.pdf]

The mathematical and experimental details of sensitized emission FRET have been reported several times by many authors: the interested reader can find details in ref.[1-3]. Here we shall provide a short mathematical description on how the normalization procedure affects SE-FRET outcomes.

Let us define:

D = donor;

[D] = donor concentration;

A = acceptor;

[A] = acceptor concentration;

DA = D-A complex;

[DA] = D-A complex concentration;

$f = [DA] / [D]$  ;

$g = [DA] / ([D] + [DA])$  ;

$I_D$  = illumination intensity at  $\lambda_D$  (excitation wavelength of donor)

$I_A$  = illumination intensity at  $\lambda_A$  (excitation wavelength of acceptor)

$\epsilon_D$  is the molar absorbance of D at  $\lambda_D$ , regardless of its complexation state;

$\epsilon_A$  is the molar absorbance of A at  $\lambda_A$ , regardless of its complexation state;

$\Phi_D$  = quantum yield of D, regardless of its complexation state, in the donor emission channel;

$\Phi_A$  = quantum yield of A, regardless of its complexation state, in the acceptor and FRET emission channel;

$F_D$  = Fluorescence collected in the donor emission channel upon excitation at  $\lambda_D$  ;

$F_A$  = Fluorescence collected in the acceptor/FRET emission channel upon excitation at  $\lambda_A$ ;

$F_{SE}$  = Fluorescence collected in the acceptor emission channel upon excitation at  $\lambda_D$  and due solely to energy transfer;

$E$  = FRET efficiency;

The actual energy resonance signal (purified from donor and acceptor spectral bleed-throughs) can be expressed as:

$$F_{SE} = I_D \epsilon_D \Phi_A E [DA] \quad (S1)$$

Let us now normalize this value by the intensity in the donor channel; we have:

$$\frac{F_{SE}}{F_D} = \frac{I_D \epsilon_D \Phi_A E [DA]}{I_D \epsilon_D \Phi_D \{[D] + (1-E)[DA]\}} = \frac{\Phi_A}{\Phi_D} \cdot \frac{f \cdot E}{\{1 + (1-E)f\}} \quad (S2)$$

If we now multiply both sides by the Donor to Acceptor quantum yield ratio (as suggested in ref. [4]), we obtain the apparent FRET efficiency  $E_D$ , a parameter that depends solely from  $E$  and the stoichiometric ratio  $f$ .

$$E_D = \frac{F_{SE}}{F_D} \cdot \frac{\Phi_D}{\Phi_A} = \frac{f \cdot E}{\{1 + (1-E)f\}} \quad (S3)$$

An alternative way to normalize the SE FRET signal is by the acceptor fluorescence  $F_A$ . In such a case, we have:

$$\frac{F_{SE}}{F_A} = \frac{I_D \epsilon_D \Phi_A E [DA]}{I_A \epsilon_A \Phi_A \{[A] + [DA]\}} = \frac{I_D}{I_A} \cdot \frac{\epsilon_D}{\epsilon_A} \cdot g \cdot E \quad (S4)$$

If we now multiply both sides by the acceptor to donor extinction ratio, we obtain the apparent FRET efficiency  $E_A$ :

$$E_A = \frac{F_{SE}}{F_A} \cdot \frac{\epsilon_A}{\epsilon_D} = \frac{I_D}{I_A} \cdot g \cdot E \quad (S5)$$

Comparison of eq. S3 and S5 shows that  $E_A$  is dependent upon the donor to acceptor excitation intensity ratio. Accordingly, for our SE-FRET analysis we adopted the donor normalization of eq. S3 to skip the apparent FRET dependence from illumination intensities.

## References

1. Xia Z, Liu Y (2001) Reliable and global measurement of fluorescence resonance energy transfer using fluorescence microscopes. *Biophys J* 81: 2395-2402.
2. Wlodarczyk J, Woehler A, Kobe F, Ponimaskin E, Zeug A, et al. (2008) Analysis of FRET signals in the presence of free donors and acceptors. *Biophys J* 94: 986-1000.

3. Feige JN, Sage D, Wahli W, Desvergne B, Gelman L (2005) PixFRET, an ImageJ plug-in for FRET calculation that can accommodate variations in spectral bleed-throughs. *Microsc Res Tech* 68: 51-58.
4. Storti B, Bizzarri R, Cardarelli F, Beltram F (2012) Intact Microtubules Preserve Transient Receptor Potential Vanilloid 1 (TRPV1) Functionality through Receptor Binding. *J Biol Chem* 287: 7803-7811.
